# Supplementary material for: Ketamine decreases neuronally released glutamate via retrograde stimulation of presynaptic adenosine A1 receptors
Source: PubMed Central journal article supplement (PMC8872981; doi:10.1038/s41380-021-01246-3), 2021-08-11

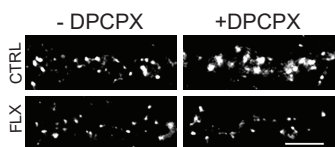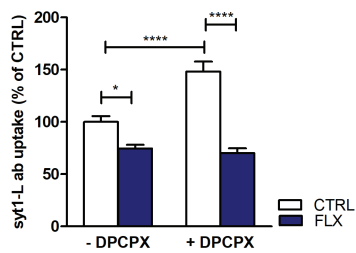

Supplement: 41380_2021_1246_MOESM10_ESM.pdf [file 41380_2021_1246_MOESM10_ESM.pdf]
